# Supplementary material for: A subset of anti-HLA antibodies induces FcγRIIa-dependent platelet activation
Source: PubMed Central journal article supplement — Haematologica. 2018 Jun 1;103(10):1741–52. doi: 10.3324/haematol.2018.189365 (PMC6165798; doi:10.3324/haematol.2018.189365), 2018-10
Supplement: 2018_189365-Disclosures_and_Contributions.pdf [file 2018_189365-Disclosures_and_Contributions.pdf]

Haematologica  
HAEMATOL/2018/189365  
Version 3

A subset of anti-HLA antibodies induces FcγRIIa-dependent platelet activation

Maike Rijkers, Anno Saris, Sebastiaan Heidt, Arend Mulder, Leendert Porcelijn, Frans H.J. Claas, Ruben Bierings, Frank W.G. Leebeek, A.J. Gerard Jansen, Gestur Vidarsson, Jan Voorberg, and Masja de Haas

Disclosures: none

Contributions: MR and AS performed the experiments and analyzed the data. MR, LP, AJGJ, GV, JV and MH designed the study. LP, RB, FWGL, AJGJ, GV, JV and MH provided feedback on experimental data included in this study. MR, LP, GV, JV and MH wrote the manuscript. SH, AM and FHJC provided critical reagents and reviewed the manuscript. All authors provided input for the manuscript.
